# Supplementary material for: Carbon dioxide sensing in an obligate insect-fungus symbiosis: CO2 preferences of leaf-cutting ants to rear their mutualistic fungus
Source: PLoS One. 2017 Apr 4;12(4):e0174597. doi: 10.1371/journal.pone.0174597 (PMC5380341; doi:10.1371/journal.pone.0174597)
Supplement: S2 File — (XLSX) [file pone.0174597.s003.xlsx]

## Sheet: Tabelle1
atmosph. vs 4% CO2									4% vs 1% CO2									4% vs 2% CO2									4% vs 3% CO2									4% vs 4% CO2									1% vs atmosph. CO2
fungus relocation (g)		ant numbers				CO2 concentration			fungus relocation (g)		ant numbers				CO2 concentration			fungus relocation (g)		ant numbers				CO2 concentration			fungus relocation (g)		ant numbers				CO2 concentration			fungus relocation (g)		ant numbers				CO2 concentration			fungus relocation (g)		ant numbers
0.04	atmosph.	4% before fungus	4% after fungus	atmosph. before fungus	atmosph. after fungus	0.04	atmosph.		0.04	0.01	4% before fungus	4% after fungus	1% before fungus	1% after fungus	0.04	0.01		0.04	0.02	4% before fungus	4% after fungus	2% before fungus	2% after fungus	0.04	0.02		0.04	0.03	4% before fungus	4% after fungus	3% before fungus	3% after fungus	0.04	0.03		0.04	0.04	4% before fungus	4% after fungus	4% before fungus	4% after fungus	0.04	0.04		0.01	atmosph.	1% before fungus	1% after fungus	atmosph. before fungus
0	0.4443	21	14	35	34	4	0.39		0.0239	0.3959	26	23	27	32	4.18	1.2		0.0248	0.3548	16	27	29	28	3.99	1.98		0.1859	0.1686	24	31	33	44	4.24	3.14		0.1622	0.2374	17	32	9	18	3.47	3.68		0.421	0	19	26	13
0	0.3968	16	7	32	51	3.78	0.27		0.401	0.0167	18	17	15	22	3.79	1.18		0.2317	0.1454	19	18	37	42	3.74	2.01		0	0.3503	28	13	34	59	3.95	3.34		0.0518	0.341	16	24	21	24	4.3	4.19		0.3836	0.0161	24	26	12
0	0.3128	13	7	16	37	4.17	0.33		0.2996	0.1596	15	13	17	33	3.84	1.04		83	0.3302	28	22	23	33	4.07	2.23		0.0512	0.2965	37	25	27	53	4.01	2.81		0	0.3916	28	16	18	36	3.64	4.29		0.4102	0.0181	52	34	14
0.1419	0.251	11	8	33	27	4.18	0.31		0.3755	0.0463	18	18	14	32	4.19	1.18		25	0.3323	22	37	26	22	4.35	2.07		0.254	0.1337	19	48	34	25	3.83	3.18		0.2463	0.0802	6	21	27	22	3.48	3.5		0.2446	82	32	34	23
0	0.4081	13	9	40	42	3.95	0.28		0	0.4333	17	11	18	27	3.83	0.85		0.0945	0.2373	12	25	32	43	3.89	2.19		0.1529	0.1897	27	48	46	31	3.77	3.16		42	0.3113	24	28	17	19	3.75	3.9		0.2579	0.1075	34	22	16
0.05	0.2406	13	17	26	25	4.29	0.37		0	0.3678	20	7	24	54	4.02	0.77		13	0.3325	27	22	17	38	4.17	2.06		0.2182	0.1253	42	50	18	23	3.97	3.29		0.2237	0.1027	32	44	25	28	4.55	4.32		0.1428	0.2126	23	17	35
0.073	0.2357	11	15	16	43	3.79	0.38		0.1816	0.1867	22	23	29	28	4.31	1.25		0.1673	0.1951	13	13	25	36	3.88	2.05		0.1826	0.1524	42	44	26	30	4.41	3.21		0.1065	0.2206	30	25	25	16	4.97	4.43		0.2925	0.0693	19	15	14
0.0409	0.2172	27	10	26	36	4.01	0.29		0.0478	0.3383	18	24	28	40	3.87	1.32		0.239	0.0825	18	23	28	27	4.3	1.96		0.0432	0.2722	42	27	17	37	4.03	3.02		0.1509	0.1813	28	30	20	26	4.9	4.93		0.2863	0	17	29	20
0	0.3867	14	8	10	31	3.92	0.13		0.0721	0.2992	18	27	33	31	3.81	1.09		33	0.3082	20	32	23	34	3.91	2.05		0.0201	0.3321	15	9	43	50	4.33	3.06		0.2474	0.0729	34	28	18	35	4.13	5.13		0.1106	0.2752	26	26	24
0	0.4065	17	11	26	33	3.82	0.32		0.0171	0.3427	24	10	13	46	4.08	1.12		0.124	0.2073	24	28	23	34	3.86	2.33		0.3383	0.0184	37	49	17	20	3.94	3.12		0.2972	0.0573	23	31	26	19	4.3	4.27		0.0461	0.3444	29	25	30
0.0271	0.3758	21	20	33	28	4.3	0.15		0.0752	0.3319	19	19	17	37	3.81	1.16		0.1531	0.2175	23	11	18	44	3.96	2.17		0.3756	0	35	54	25	19	4.39	3.16		0.0179	0.3341	35	31	17	22	4.45	3.82		0.3623	0	33	41	20
0	0.4391	18	12	25	24	4.16	0.29		0.3286	0.0577	19	35	26	33	4.1	0.92		0.0208	0.3811	12	23	30	37	3.91	2.03		0.0901	0.2961	28	36	41	40	4.44	3.33		0.0849	0.2528	14	21	23	16	4.78	4.43		0.3218	0.05	28	41	24
54	0.4338	17	6	35	38	3.77	0.2		0.1005	0.2903	11	12	24	31	3.83	1.01		0.2132	0.1033	20	22	27	42	3.86	2.06		0	0.3687	20	20	36	28	4.29	3.43											0.5018	0.0271	33	33	15
0.0385	0.3868	16	19	38	39	4.15	0.16		0	0.3959	16	12	20	49	4.06	1.31		0.1455	0.1812	26	20	23	31	4.14	2.22		0	0.377	24	25	20	37	4.15	3.18											0.2763	0.036	25	29	27
0.0181	0.3786	10	17	27	49	3.78	0.31		0	0.3741	19	9	31	60	3.82	1.29		0	0.332	15	16	23	48	4.26	2.33		0	0.3312	26	11	25	40	3.83	3.06											0.1002	0.2289	40	29	15
0	0.3908	13	11	31	49	3.93	0.16		0.0406	0.3273	23	28	23	44	3.82	1.33		0.0562	0.2913	15	14	12	37	4.09	1.95		0.1636	0.1766	19	30	34	36	4.07	2.76
0	0.3678	18	7	23	37	4.22	0.39		0.0423	0.2988	25	19	28	43	4.17	0.92		0.0272	0.3242	10	11	30	33	3.76	1.89		97	0.3383	24	13	26	29	4.08	3.28
0	0.354	14	7	25	58	3.87	0.29		33	0.339	29	15	8	44	3.95	1.18		0.2174	0.1237	24	31	26	32	4.12	2.21		0.1839	0.1604	26	21	17	23	4.04	3.07
									0	0.3851	23	17	23	38	4.35	1.31		0	0.3915	24	23	20	23	4.02	2.19		0.0135	0.3938	22	14	36	28	3.94	3.05
									0.1565	0.2241	29	21	22	35	3.98	1.05		0.1197	0.2731	21	19	27	38	4.42	1.96		0.2783	0.1175	18	14	27	21	4.33	2.89
									0.0721	0.3219	15	14	32	35	4.18	1.36		0.033	0.3591	19	12	27	28	3.99	1.93
																		0.0692	0.3011	7	10	45	43	4.16	2.09
																		0.1877	0.1136
																		0	0.3117
																		0.1261	0.1791
																		0	0.3524
[truncated: 54 more columns]
